# Supplementary material for: The Beet Cyst Nematode Heterodera schachtii Modulates the Expression of WRKY Transcription Factors in Syncytia to Favour Its Development in Arabidopsis Roots
Source: PubMed Central journal article supplement (PMC4102525; doi:10.1371/journal.pone.0102360), 2014-07-17

**Figure S1 – Preliminary resistance tests of overexpression lines with syncytium-specific promoters.**

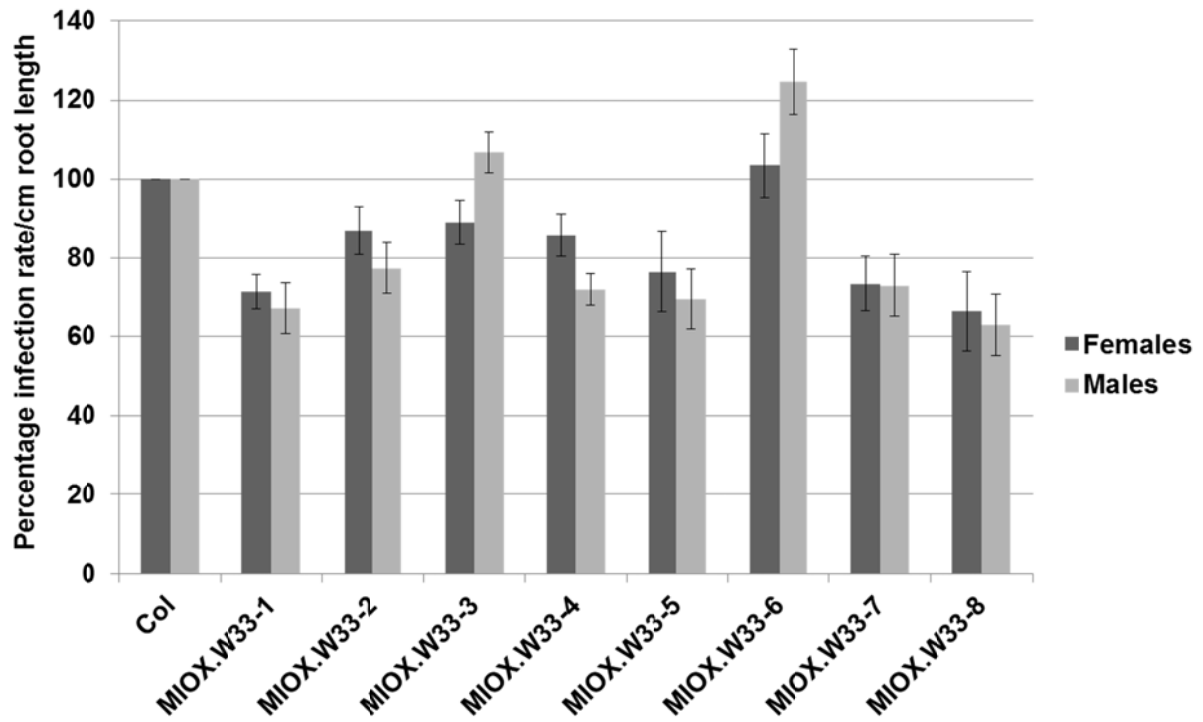

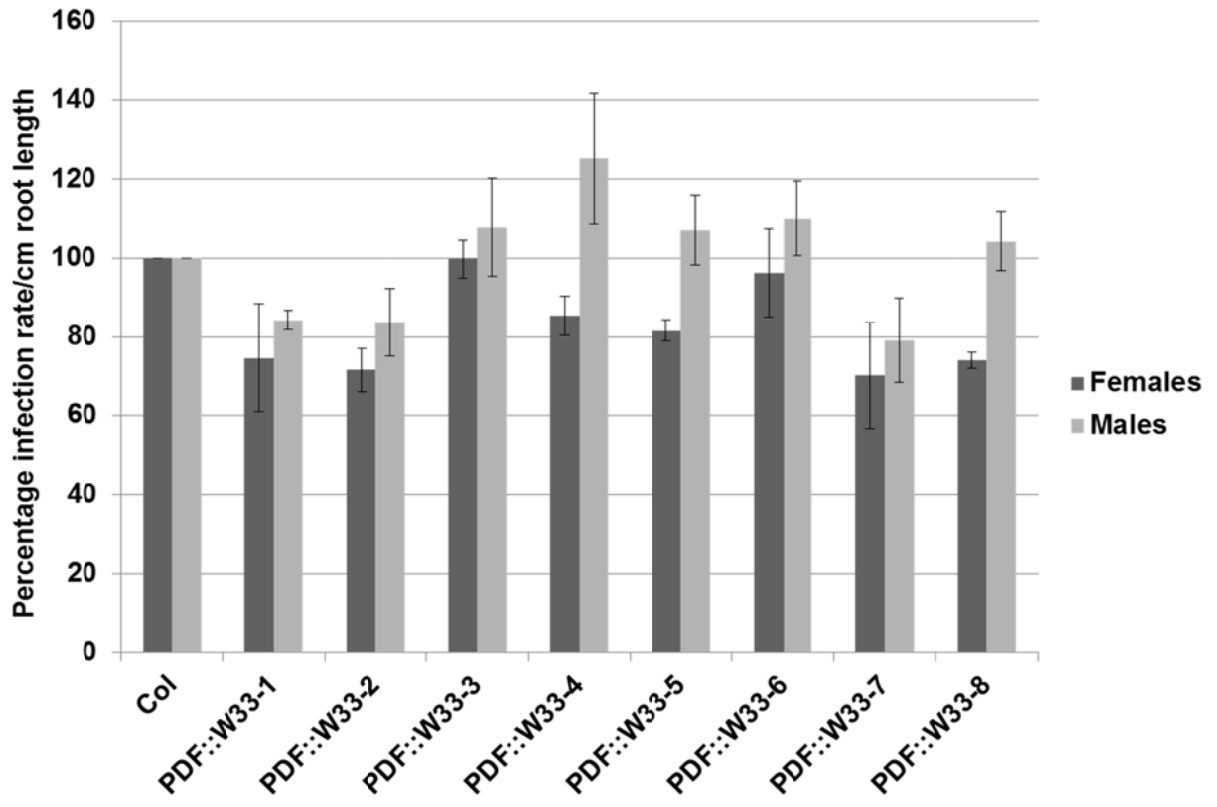

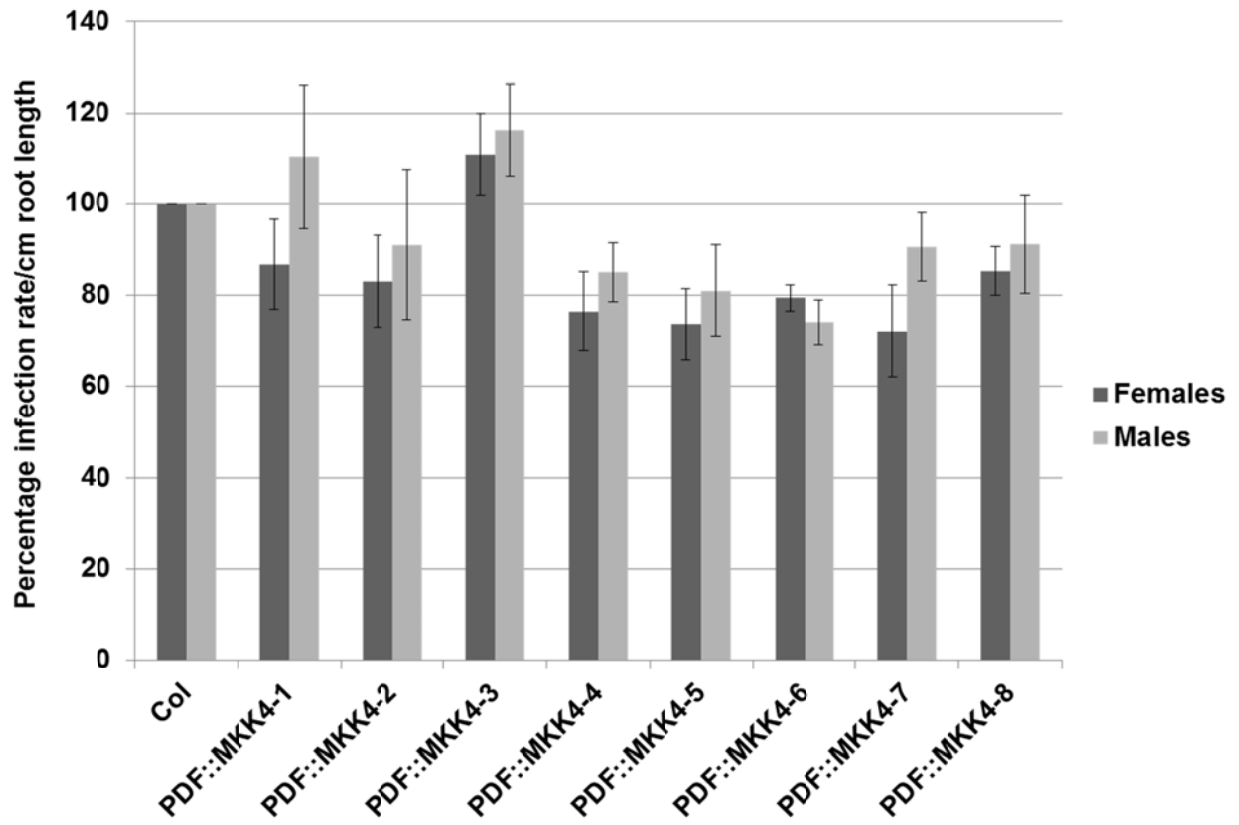

Supplement: pone.0102360.s001.pdf [file pone.0102360.s001.pdf]
