# Supplementary material for: The Beet Cyst Nematode Heterodera schachtii Modulates the Expression of WRKY Transcription Factors in Syncytia to Favour Its Development in Arabidopsis Roots
Source: PubMed Central journal article supplement (PMC4102525; doi:10.1371/journal.pone.0102360), 2014-07-17
Supplement: pone.0102360.s002.pdf [file pone.0102360.s002.pdf]

Figure S2 – Examples of syncytia and attached females for different lines.

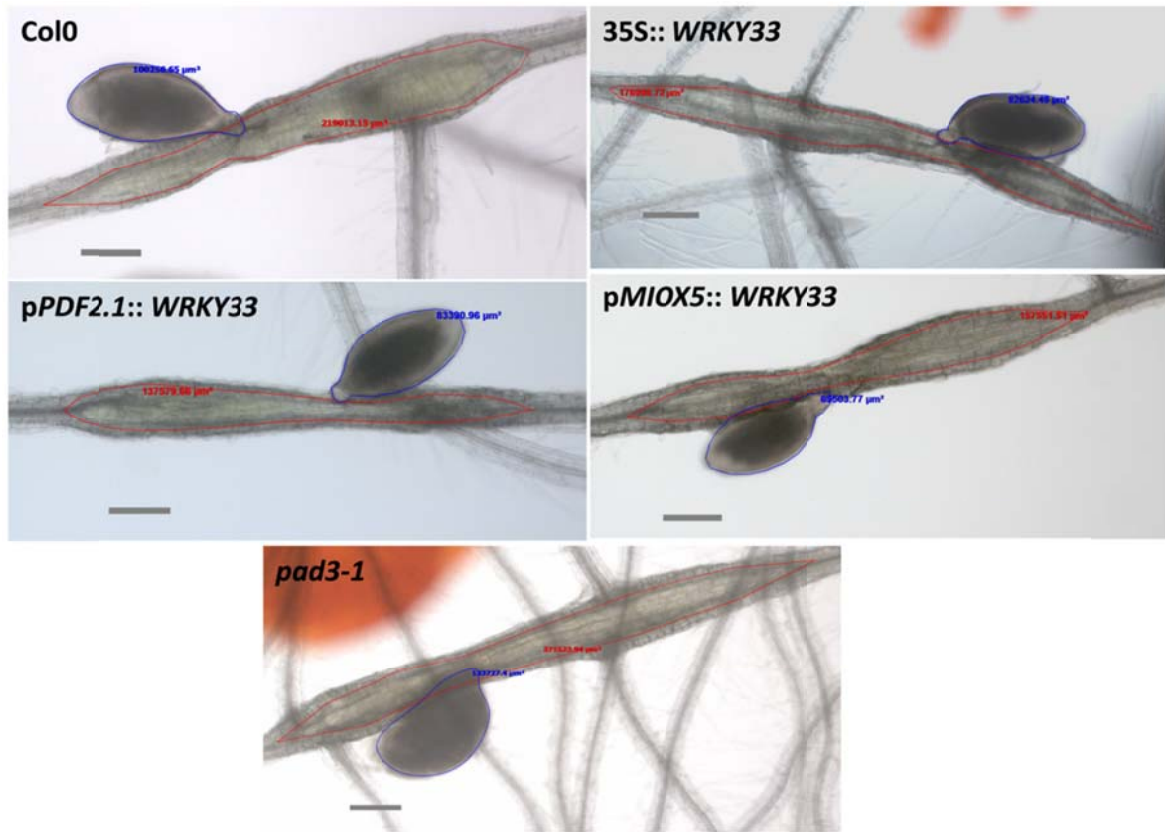

At 14 dpi pictures were taken to measure the size of syncytia and female nematodes.

Bar = 100  $\mu\text{m}$ .
