# Supplementary material for: The Beet Cyst Nematode Heterodera schachtii Modulates the Expression of WRKY Transcription Factors in Syncytia to Favour Its Development in Arabidopsis Roots
Source: PubMed Central journal article supplement (PMC4102525; doi:10.1371/journal.pone.0102360), 2014-07-17
Supplement: pone.0102360.s005.pdf [file pone.0102360.s005.pdf]

**Table S1: Primers used in this study**

|                    |                                   |
|--------------------|-----------------------------------|
| pMIOX5for_Eco      | AGAGAATTCGAGGAAGATGAGACTGA        |
| pMIOX5rev_Nco      | ATATCCATGGCATCTTCCAAAAAAAAACAAAGT |
| cWRKY33forNco      | TTCCCATGGCTGCTTCTTTTCTTAC         |
| cWRKY33revBam      | TTCCTTGGATCCTCAGGGCATAAAC         |
| WRKY33RTfor        | GTGTACAATGCCAGTTTGGATCA           |
| WRKY33RTrev        | GATGGTTGTGCACTTGTAGTAGC           |
| WRKY33seq1         | CTAGCTTCTCCAACCACAGGAG            |
| WRKY33rseq2        | CGTTGTCTGCACTACGATTCTC            |
| WRKY33qRTfor       | GAAGATTGTGGGAGTGAACCTGA           |
| WRKY33qRTrev       | ACTTGTAGTAGCTTCTTGGATTTGGG        |
| q18Sfor            | GGTGGTAACGGGTGACGGAGAAT           |
| q18Srev            | CGCCGACCGAAGGGACAAGCCGA           |
| MKK4forNco2        | AAAGCCATGGGACCGATTCAATCGCCTCCAG   |
| MKK4Mfor           | GATATGGACCCGTGTAATGACTCTGTTGGAACC |
| MKK4Mrev           | GTCATTACACGGGTCCATATCCTGAGCCAAAGG |
| MKK4revBam         | AGAGGATCCGCTATGTGGTTGGAGAAG       |
| promWRKY17forEcoRI | TTTCGAATTCGCTGTTCTCAACTAAAGAC     |
| promWRKY17revNcoI  | AACGGCCATGGTGAGAAACCAGAGGAG       |
